# Supplementary material for: Acidic ascites inhibits ovarian cancer cell proliferation and correlates with the metabolomic, lipidomic and inflammatory phenotype of human patients
Source: Springer Nature journal article supplement (doi:10.1186/s12967-022-03763-3), 2022-12-12
Supplement: MOESM1 [file 23816272]

## Additional File 1

# Acidic ascites inhibits ovarian cancer cell proliferation and correlates with the metabolomic, lipidomic and inflammatory phenotype of human patients

Qianlu Yang<sup>1,2</sup>, Gyuntae Bae<sup>2</sup>, Giorgi Nadiradze<sup>1,3</sup>, Arianna Castagna<sup>1,3</sup>, Georgy Berezhnoy<sup>2</sup>, Laimdota Zizmare<sup>2</sup>, Aditi Kulkarni<sup>2</sup>, Yogesh Singh<sup>4,5</sup>, Frank J. Weinreich<sup>1</sup>, Stefan Kommos<sup>5</sup>, Marc A. Reymond<sup>1,3</sup>, Christoph Trautwein<sup>2,\*</sup>

<sup>1</sup> National Center for Pleura and Peritoneum, NCT South-West Germany, Tübingen, Germany

<sup>2</sup> Department of Preclinical Imaging and Radiopharmacy, Werner Siemens Imaging Center, University Hospital Tübingen, Germany

<sup>3</sup> Department of General and Transplant Surgery, University Hospital Tübingen, Germany

<sup>4</sup> Institute of Medical Genetics and Applied Genomics, University Hospital Tübingen, Germany

<sup>5</sup> Research Institute of Women's Health, Women's Hospital, University Hospital Tübingen, Germany

\* Corresponding author name and email address: [christoph.trautwein@med.uni-tuebingen.de](mailto:christoph.trautwein@med.uni-tuebingen.de)

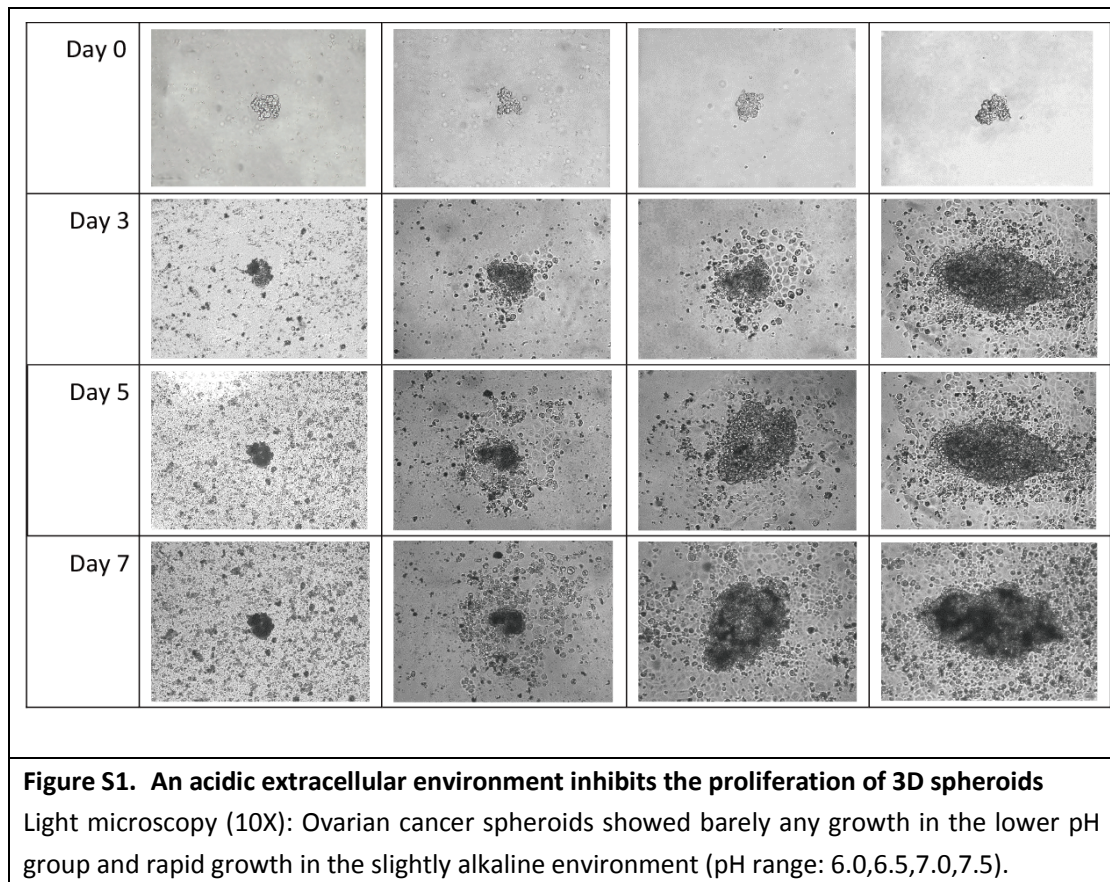

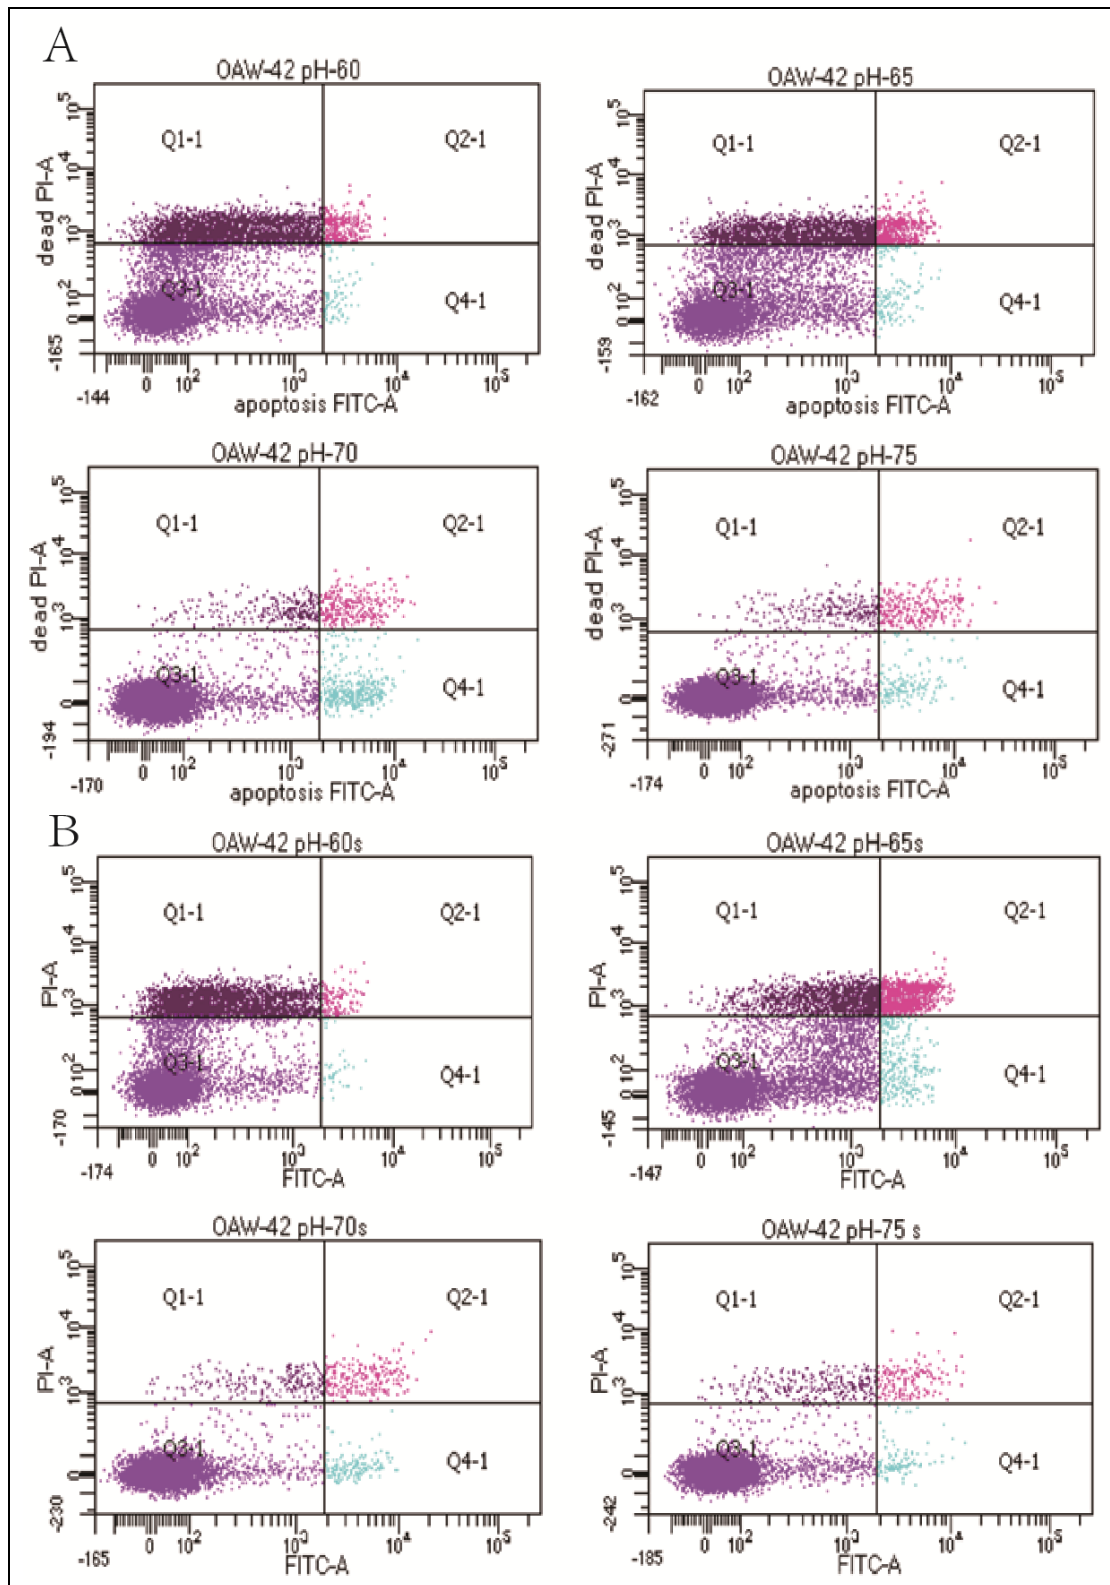

**Figure S2. Flow cytometric analysis of the effect of pH on apoptosis of OAW42 cells in 10% malignant ovarian ascites at different pHs**

A) Apoptosis rate of OAW45 cells at different pHs (6.0, 6.5, 7.0, 7.5). B) Apoptosis rate of OAW45 cells at different pHs with 10% ascites.

**Table S1 – Fold changes of polar metabolites on ovarian cancers with II-III vs IV.**

|                   | FC      | log2(FC) | raw.pval  | -log10(p) |
|-------------------|---------|----------|-----------|-----------|
| Alanine           | 0.44628 | -1.164   | 0.002351  | 2.6288    |
| Isoleucine        | 0.79325 | -0.33415 | 0.0040014 | 2.3978    |
| Phenylalanine     | 0.39805 | -1.329   | 0.014645  | 1.8343    |
| 3-Hydroxybutyrate | 2.3475  | 1.2311   | 0.02715   | 1.5662    |
| Glutamine         | 0.66784 | -0.58243 | 0.049762  | 1.3031    |

**Table S2 – Full matrix of all obtained molecular and physical-chemical ascites parameters of stages II-III and IV.**

| Parameter                | Stage II- III | Stage IV     |
|--------------------------|---------------|--------------|
| pH                       | 7.51±0.16     | 7.78±0.16    |
| pCO2 (mmHg)              | 22.05±14.56   | 17.33±2.08   |
| Na+ (mmol/L)             | 142.00±8.04   | 136.22±1.35  |
| K+(mmol/L)               | 3.24±1.61     | 4.34±0.63    |
| Ca2+(mmol/L)             | 0.89±0.38     | 1.12±0.06    |
| Cl-(mmol/L)              | 121.24±17.67  | 108.77±5.59  |
| Glu (mg/dL)              | 65.81±33.54   | 102.78±13.42 |
| Lac (mmol/L)             | 1.73±1.36     | 2.10±0.85    |
| 2-Hydroxybutyrate        | 2.13±1.42     | 2.22±0.96    |
| 3-Hydroxybutyrate        | 25.64±15.04   | 11.31±17.39  |
| 3-Hydroxyisobutyrate     | 0.32±0.17     | 0.68±0.45    |
| 3-Hydroxyisovaleric acid | 1.91±1.01     | 1.81±0.66    |
| Acetate                  | 3.29±0.15     | 3.29±0.21    |
| Acetone                  | 2.69±4.96     | 0.57±0.72    |
| Alanine                  | 3.87±1.92     | 9.73±3.35    |
| Asparagine               | 1.45±0.62     | 1.37±0.81    |
| Carnitine                | 0.74±0.41     | 1.15±0.87    |
| Choline                  | 0.22±0.19     | 0.32±0.11    |
| Citric acid              | 0.74±0.34     | 0.98±0.19    |
| Creatine                 | 1.34±0.83     | 1.21±1.21    |
| Creatine phosphate       | 1.06±0.56     | 1.44±0.26    |
| Formate                  | 0.86±0.57     | 0.96±0.22    |
| Glucose                  | 75.72±33.67   | 138.16±47.17 |
| Glutamate                | 4.60±3.54     | 3.75±3.09    |
| Glutamine                | 7.95±3.73     | 14.15±1.68   |
| Glutathione              | 0.45±0.24     | 0.41±0.07    |
| Glycerol                 | 6.23±2.95     | 7.27±1.72    |
| Glycine                  | 5.69±3.02     | 8.58±1.96    |
| Histidine                | 1.41±0.72     | 1.79±0.28    |

|                                    |                 |                   |
|------------------------------------|-----------------|-------------------|
| Hypotaurine                        | 1.13±0.61       | 1.92±1.86         |
| Isoleucine                         | 1.49±0.55       | 2.21±0.31         |
| Lactate                            | 38.13±30.99     | 69.74±35.05       |
| Leucine                            | 3.25±1.59       | 3.66±0.60         |
| Lysine                             | 3.36±1.43       | 4.86±0.82         |
| O-Phosphocholine                   | 0.43±0.19       | 0.482±0.08        |
| Ornithine                          | 1.47±0.44       | 1.921±0.68        |
| Phenylalanine                      | 1.08±0.43       | 3.378±2.75        |
| Proline                            | 2.83±1.73       | 3.358±1.11        |
| Threonine                          | 4.09±3.09       | 5.09±0.89         |
| Tyrosine                           | 1.10±0.51       | 1.69±0.18         |
| Valine                             | 5.09±2.11       | 7.97±0.93         |
| sn-Glycerol-3-phosphocholine       | 1.34±0.54       | 1.26±0.65         |
| CE (Cholesterol Ester)             | 0.39±0.32       | 0.32±0.07         |
| FA (Fatty Acids)                   | 0.01±0.01       | 0.006±0.00        |
| FC (Free Cholesterol)              | 0.29±0.19       | 0.26±0.13         |
| LA (Linoleic Acid)                 | 0.03±0.02       | 0.02±0.01         |
| MUFA (Monounsaturated Fatty Acids) | 0.01±0.01       | 0.008±0.00        |
| PL (Phospholipids)                 | 0.32±0.06       | 0.20±0.02         |
| PUFA (Polyunsaturated Fatty Acids) | 0.03±0.02       | 0.02±0.00         |
| SFA (Saturated Fatty Acids)        | 0.10±0.07       | 0.07±0.01         |
| TC (Total Cholesterol)             | 0.362±0.29      | 0.29±0.06         |
| TG (Triglycerides)                 | 0.008±0.01      | 0.004±0.00        |
| UFA (Unsaturated Fatty Acids)      | 0.04±0.03       | 0.03±0.01         |
| w-3 FA (Omega-3 Fatty Acids)       | 0.08±0.06       | 0.06±0.01         |
| MCP-1 (A8)                         | 840.45±1359.80  | 1998.66±3120.40   |
| IL-6 (A10)                         | 4510.35±3502.17 | 15267.12±14619.95 |
| IL-8 (B2)                          | 650.87±1138.10  | 281.04±297.60     |
| IL-10 (B3)                         | 115.67±76.64    | 166.62±228.32     |
| IL-18 (B6)                         | 179.14±162.49   | 322.41±283.25     |

**Table S3 – Patient Survival Time Information.**

| ID          | Survival (Months) | State | ID          | Survival (Months) | State |
|-------------|-------------------|-------|-------------|-------------------|-------|
| ASC-GC-B-2  | 0.3               | dead  | ASC-OC-B-11 | 2                 | dead  |
| ASC-OC-T-4  | 15                | alive | ASC-OC-T-12 | 11                | dead  |
| ASC-OC-T-6  | 2                 | dead  | ASC-OC-T-13 | 12                | alive |
| ASC-OC-T-7  | 15                | alive | ASC-OC-T-14 | 12                | alive |
| ASC-OC-T-10 | 6                 | dead  | ASC-OC-T-15 | 1                 | dead  |

**Table S4 – Patient peritoneal metastasis information.**

| ID          | peritoneal metastasis                                                                                                                                                                                                                      |
|-------------|--------------------------------------------------------------------------------------------------------------------------------------------------------------------------------------------------------------------------------------------|
| ASC-GC-B-2  | Extensive peritoneal metastasis, M1b: Gastric metastasis                                                                                                                                                                                   |
| ASC-OC-T-4  | omentum majus: 0.9cm, colonic mesentery:0.2cm, splenic hilum:0.5cm, hepatoduodenal ligament:0.3cm                                                                                                                                          |
| ASC-OC-T-6  | Extensive peritoneal metastasis                                                                                                                                                                                                            |
| ASC-OC-T-7  | omentum majus: 0.7cm, diaphragm: 3.5cm, hepatoduodenal ligament: 1.5cm, gallbladder peritoneum: 0.3cm, pancreas: 2.5cm, omentum minus:0.2cm, M1b: pleura                                                                                   |
| ASC-OC-T-10 | omentum majus: multiple (3.5cm max), small intestinal plasma membrane: 0.3cm, hepatoduodenal ligament: 0.5cm, hepatic hilar: 1.2cm, small intestinal plasma membrane: 2.5cm                                                                |
| ASC-OC-B-11 | Extensive peritoneal metastasis, M1b: pleura                                                                                                                                                                                               |
| ASC-OC-T-12 | omentum majus: 5.5cm, omentum minus: 1.0cm, gallbladder peritoneum: 0.5cm, ileocecal: 3.5cm, bladder peritoneum: 3.5cm, left septum adipose tissue: 9cm, spleen peritoneum: 9.5cm                                                          |
| ASC-OC-T-13 | No                                                                                                                                                                                                                                         |
| ASC-OC-T-14 | omental capsule: 0.5cm, colonic mesentery: 0.3cm, splenic peritoneum: 6.5cm, pancreas: 0.3cm                                                                                                                                               |
| ASC-OC-T-15 | omentum majus: 3.2cm, multiple rectal wall: 1.9cm, colonic plasma membrane: 0.5cm, small intestinal plasma membrane: 1cm, colonic plasma membrane: 1.5cm, peripancreatic tissue: 2.8cm, splenic peritoneum: 2.5cm, renal peritoneum: 0.9cm |
